# Supplementary material
Source: Springer Nature journal article supplement (https://www.springermedizin.de/resource/supplementary/13063_2012_1214_MOESM2_ESM.pdf/9619476)
Supplement: MOESM2 [file 9619476]

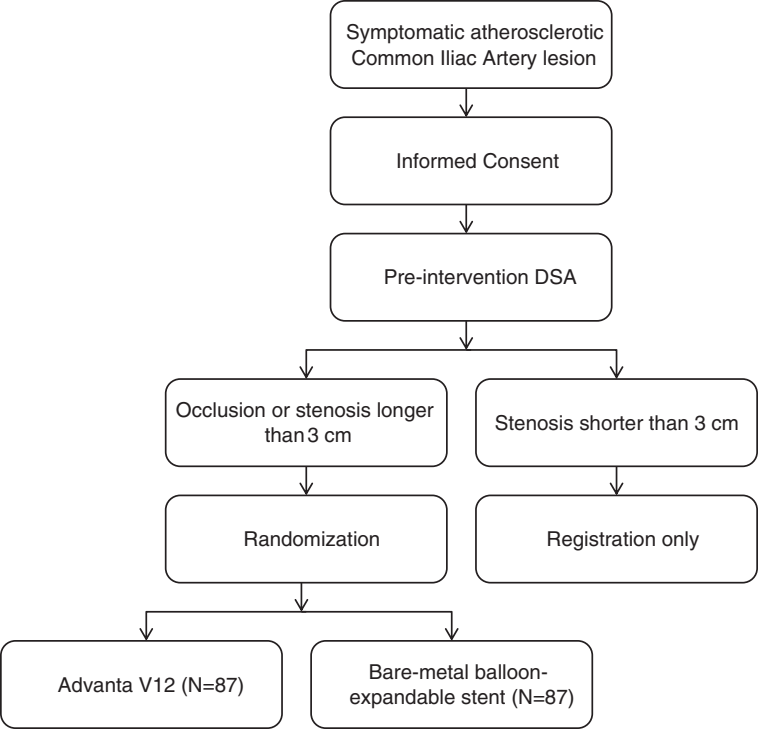

Symptomatic atherosclerotic  
Common Iliac Artery lesion

Informed Consent

Pre-intervention DSA

Occlusion or stenosis longer  
than 3 cm

Stenosis shorter than 3 cm

Randomization

Registration only

Advanta V12 (N=87)

Bare-metal balloon-  
expandable stent (N=87)
